# Supplementary material
Source: Elsevier journal article supplement (https://comptes-rendus.academie-sciences.fr/geoscience/article/10.1016/j.crte.2016.01.001/file/attach/mmc2.pdf)

### Châinons Béarnais and Aquitaine Basin

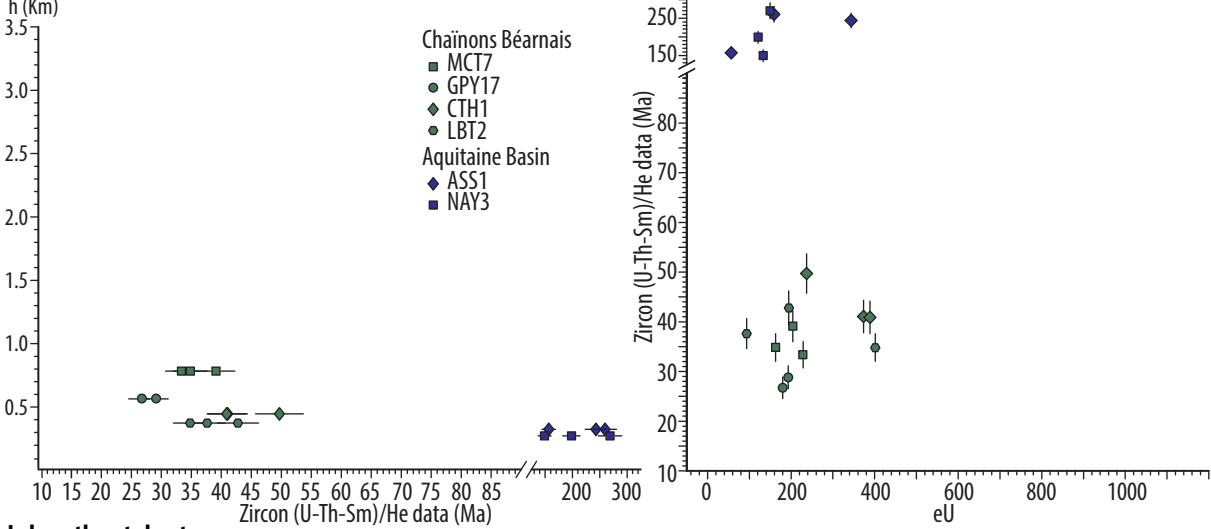

### Lakora thrust sheet

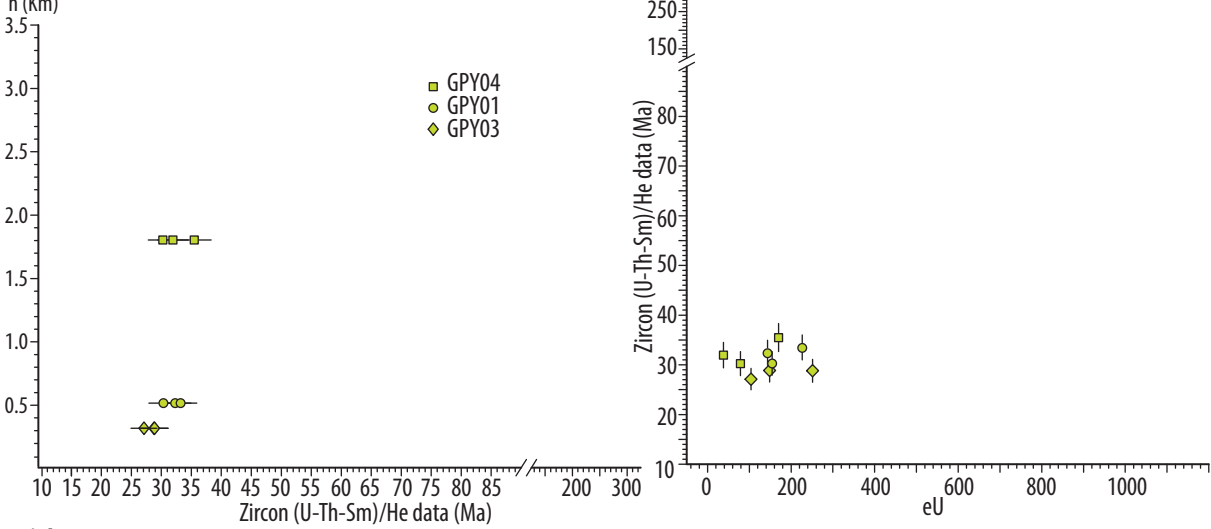

### Axial Zone cover

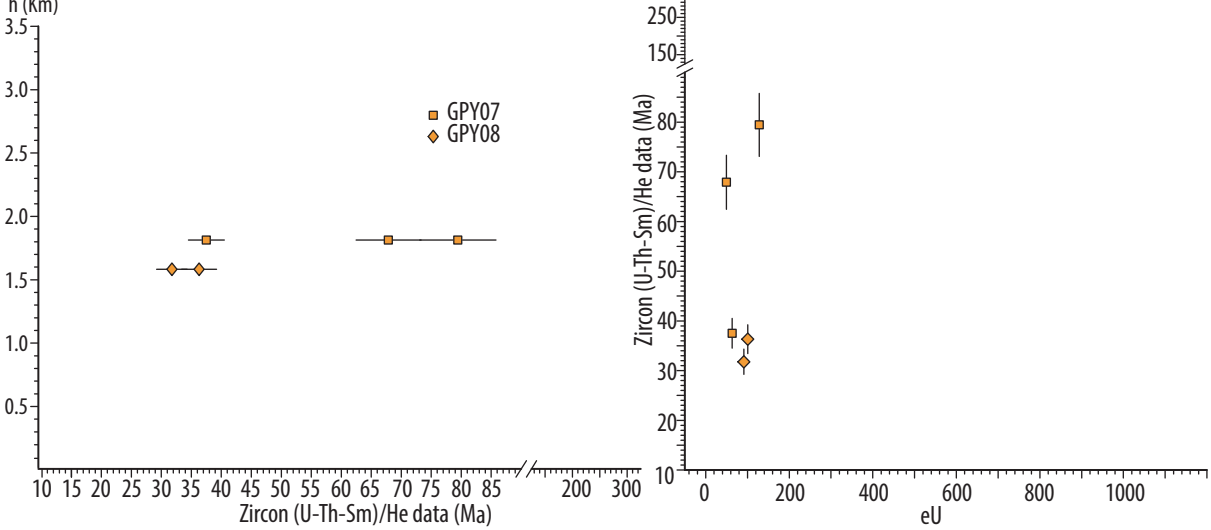

### Western Axial Zone: detrital Paleozoic rocks

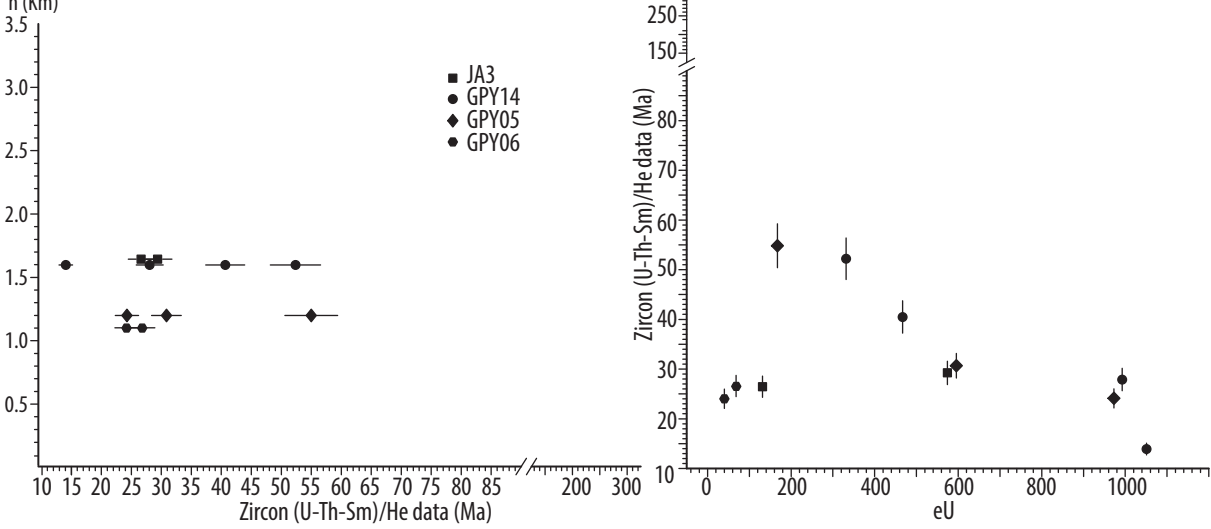

### Western Axial Zone: Eaux-Chaudes and Balaitous-Panticosa plutons

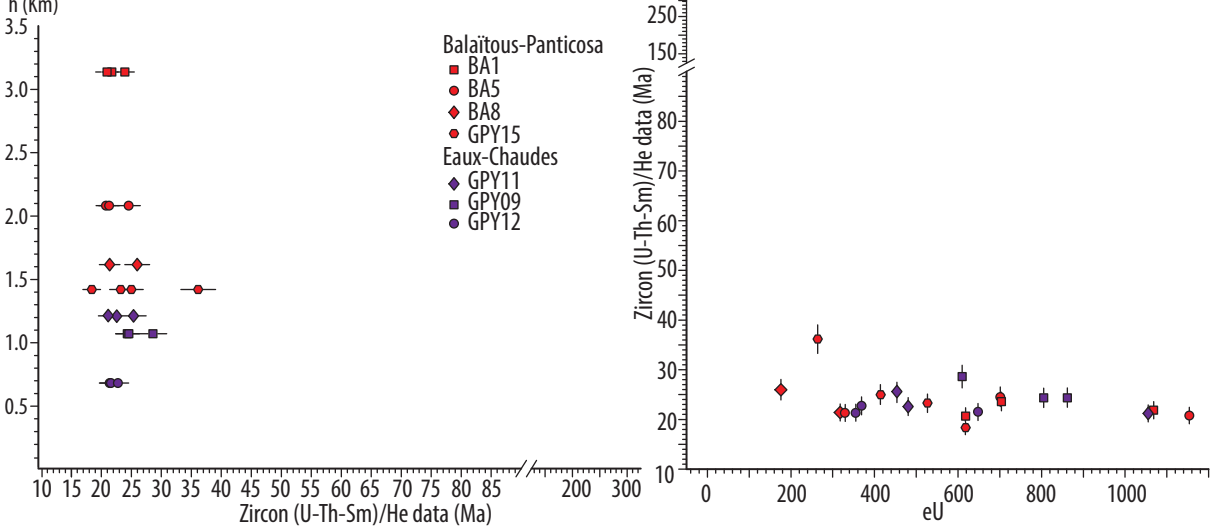

Supplement: mmc2 [file mmc2.pdf]
